# Supplementary material for: Dynamic memristor array with multiple reservoir states for training efficient neuromorphic computing
Source: Royal Society of Chemistry journal article supplement (doi:10.1039/d4tc02324b), 2024-01-01
Supplement: d4tc02324b1.pdf [file d4tc02324b1.pdf]

## *Supplementary Materials*

### Dynamic memristor array with multiple reservoir states for training efficient neuromorphic computing

Minseo Noh, Dongyeol Ju, Sungjun Kim

Division of Electronics and Electrical Engineering, Dongguk University, Seoul 04620, Republic of Korea

\* Corresponding author: [sungjun@dongguk.edu](mailto:sungjun@dongguk.edu) (S. Kim)

#### **Contents:**

**Table S1.** Comparative assessment of memristive device performance in multifunctional synaptic applications with respect to prior research.

**Figure S1.** I-V curves acquired from 10 different cells.

**Figure S2.** (a) 20 cycle endurance properties of the randomly selected 10 cells. (b) The average on/off ratio of each 10 cells.

**Figure S3.** (a) Schottky emission conduction mechanism fitting in the LRS state of device. (b) Schottky emission conduction mechanism fitting in the HRS state of device. (c) Direct tunneling conduction mechanism fitting in the LRS state of device. (d) Direct tunneling conduction mechanism fitting in the HRS state of device.

**Figure S4.** Illustration of conduction mechanism to explain the oxygen vacancy migration during the (a) set process and the (b) reset process.

**Figure S5.** (a) Pulse schematics for potentiation and depression. (b) Potentiation and depression curves acquired through applied pulse schemes. (c) 20-cycle repeated potentiation and depression behavior.

**Figure S6.** (a) The transition from STM to LTM depending on the number of write pulses. (b) PPF index represented as a function of time interval between twin spikes. Two identical pulses of 4 V and 500  $\mu$ s duration were applied at various pulse intervals. (c) Each different EPSC Gain acquired depending on the number and amplitude of the set pulse. (d) SADP function acquired through applying 10 sequential pulses of increasing amplitude. (e) SRDP function acquired through applying 10 sequential pulses of increasing interval.

**Figure S7.** Schematic illustration of the pattern recognition system using reservoir computing system.

**Figure S8.** (a) 4-bit reservoir computing implemented from 5 different cells. (b) Pattern

recognition accuracy achieved with 20 consecutive epochs applied to 5 cells.

| Structure                                                                    | Device structure | Switching behavior | Endurance       | Memory function | Synapse emulations     | Multifunctional behavior                            | Ref       |
|------------------------------------------------------------------------------|------------------|--------------------|-----------------|-----------------|------------------------|-----------------------------------------------------|-----------|
| TiW/Al <sub>2</sub> O <sub>3</sub> /Ta <sub>2</sub> O <sub>5</sub> /Ta       | Planar           | Analog             | NA              | Volatile        | NA                     | NA                                                  | [S1]      |
| Ti/TiO <sub>2</sub> /HfO <sub>2</sub> /Si                                    | Planar           | Analog             | 10 <sup>3</sup> | Volatile        | MLC, STDP              | NA                                                  | [S2]      |
| Pt/TiO <sub>2</sub> /ZrO <sub>2</sub> /Pt                                    | Planar           | Analog             | 10 <sup>3</sup> | Non volatile    | STDP                   | NA                                                  | [S3]      |
| Ag/aloe vera/FTO                                                             | Planar           | Analog             | 10 <sup>2</sup> | Volatile        | NA                     | Pavlov training                                     | [S4]      |
| TiN/Ti/AlO <sub>x</sub> /HfO <sub>x</sub> /TiN                               | Planar           | digital            | NA              | Non volatile    | NA                     | NA                                                  | [S5]      |
| Ti/TiO <sub>2</sub> /Si                                                      | Planar           | Analog             | NA              | Non volatile    | PPF                    | Reservoir computing                                 | [S6]      |
| Pt/Al/TiO <sub>y</sub> /TiO <sub>x</sub> /Al <sub>2</sub> O <sub>3</sub> /Pt | Crossbar-array   | Analog             | 10 <sup>2</sup> | Volatile        | EPSC, PPF, SRDP, SADP, | Pavlov training, synapse array, reservoir computing | This work |

**Table S1.** Comparative assessment of memristive device performance in multifunctional synaptic applications with respect to prior research.

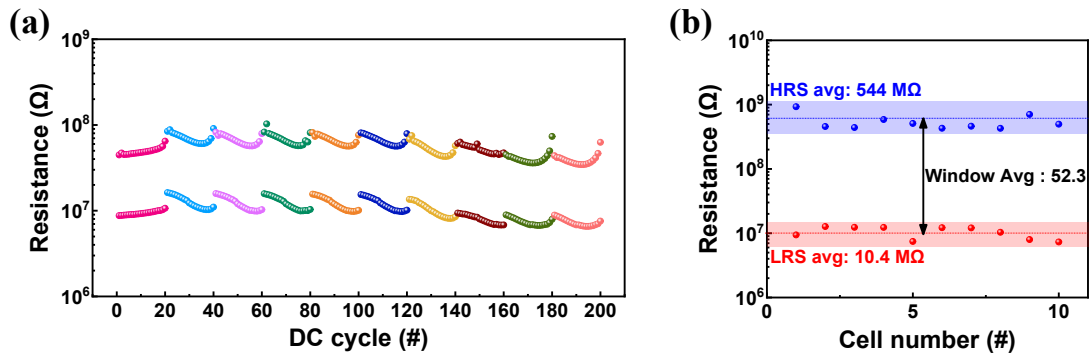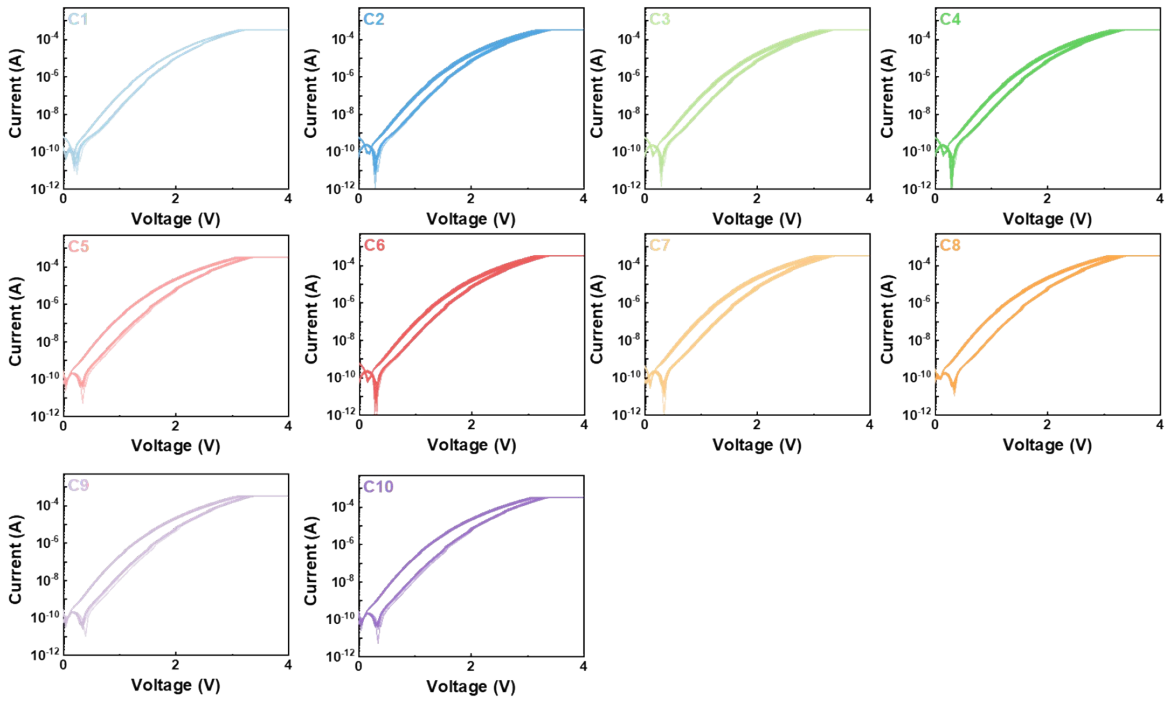

**Figure S1.** I-V curves acquired from 10 different cells.

**Figure S2.** (a) 20 cycle endurance properties of the randomly selected 10 cells. (b) The average on/off ratio of each 10 cells.

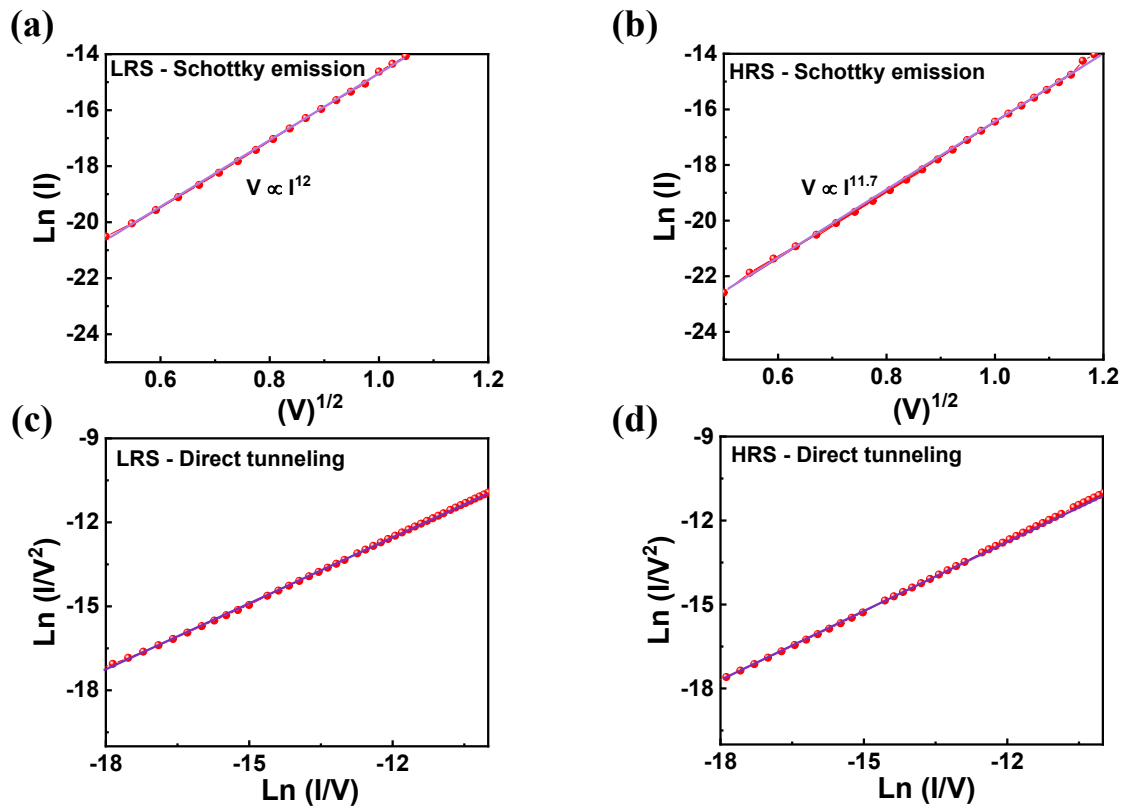

**Figure S3.** (a) Schottky emission conduction mechanism fitting in the LRS state of device. (b) Schottky emission conduction mechanism fitting in the HRS state of device. (c) Direct tunneling conduction mechanism fitting in the LRS state of device. (d) Direct tunneling conduction mechanism fitting in the HRS state of device.

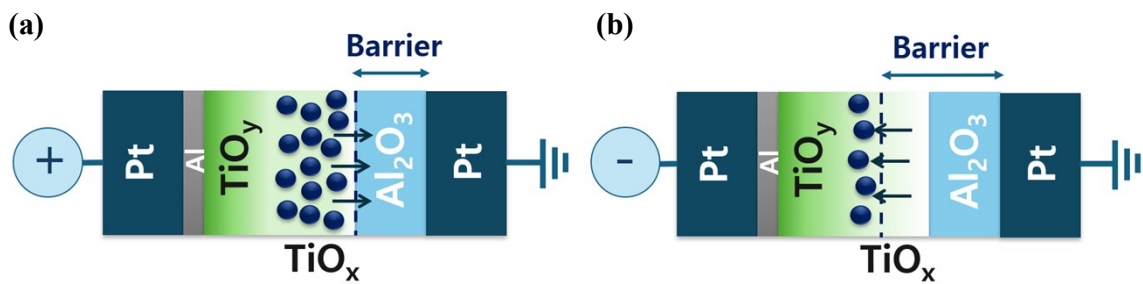

**Figure S4.** Illustration of conduction mechanism to explain the oxygen vacancy migration during the (a) set process and the (b) reset process.

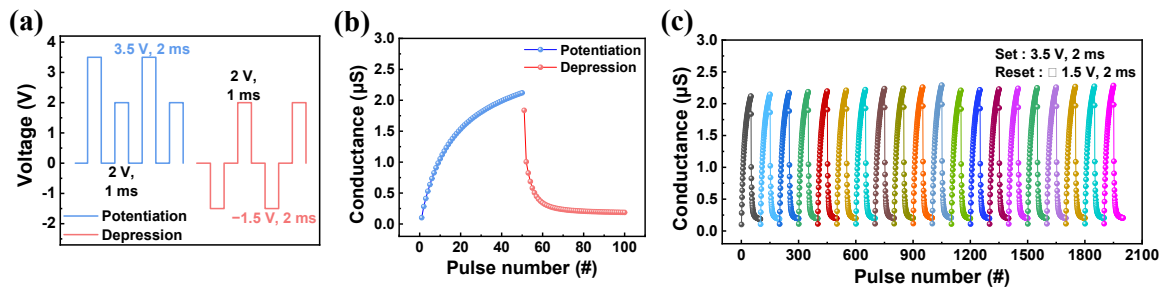

**Figure S5.** (a) Pulse schematics for potentiation and depression. (b) Potentiation and depression curves acquired through applied pulse schemes. (c) 20-cycle repeated potentiation and depression behavior. Potentiation pulses are composed of 50 identical set pulses at 3.5 V and 50 read pulses at 2 V. Depression pulses consist of identical reset pulses at -1.5 V and 50 read pulses at 2 V. All pulse intervals are fixed at 1 ms, and all pulse widths are set to 2 ms. Consequently, gradual increase and decrease of conductance values are observed.

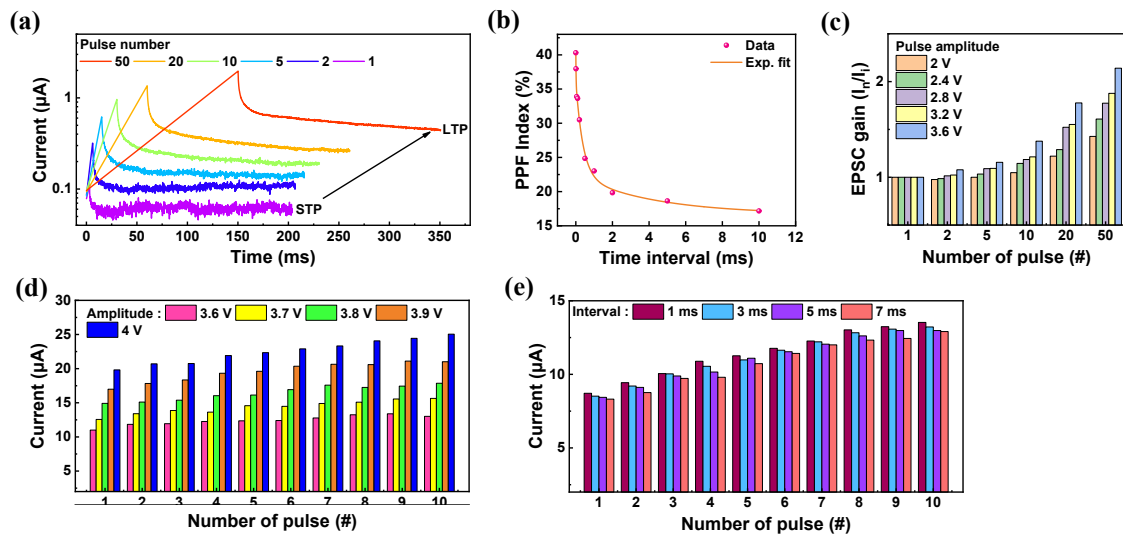

**Figure S6** (a) The transition from STM to LTM depending on the number of write pulses. (b) PPF index represented as a function of time interval between twin spikes. Two identical pulses

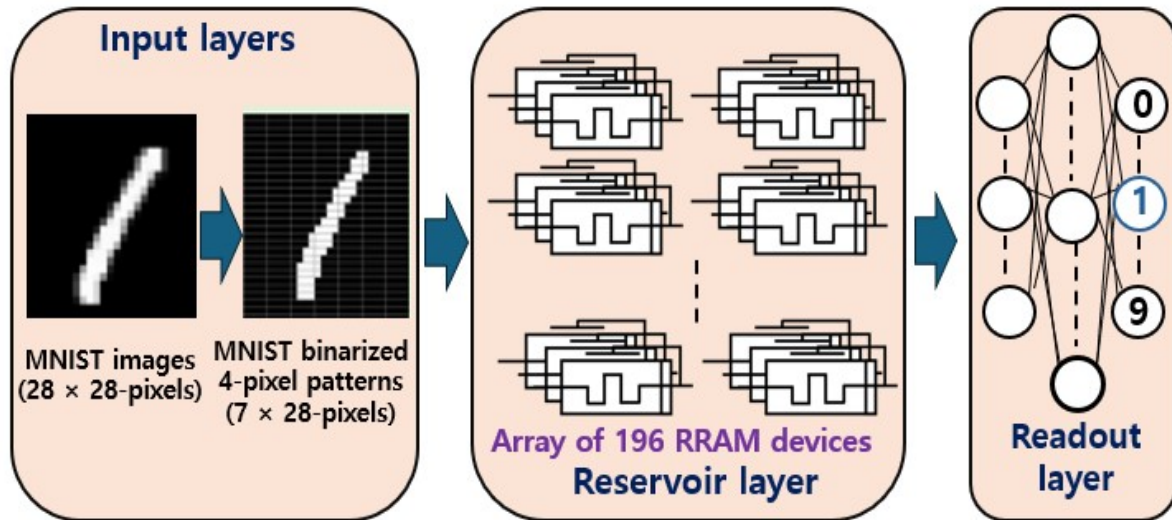

of 4 V and 500  $\mu$ s duration were applied at various pulse intervals. (c) Each different EPSC Gain acquired depending on the number and amplitude of the set pulse. (d) SADP function acquired through applying 10 sequential pulses of increasing amplitude. (e) SRDP function acquired through applying 10 sequential pulses of increasing interval. For such experiment, write pulses of amplitude and width of 3.5 V and 2 ms was applied, under different numbers. Moreover, a series of read pulses were conducted to observe the current decay following the application of a stimulus at 2 V for 0.2 s. Sequential application of a small number of write pulses results in a gradual current decay as the device returns to its original HRS after short period of time. On the contrary, increasing the number of write pulses prevents the current from reverting to its initial state. During the same 0.2 s decay period, the increase in write pulses led to a gradual facilitation of current, suggesting a transition towards LTM, replicating the memory property of the biological brain whereupon the process of rehearsal or under stronger stimuli, the transition from STM to LTM occurs.

**Figure S7.** Schematic illustration of the pattern recognition system using reservoir computing system.

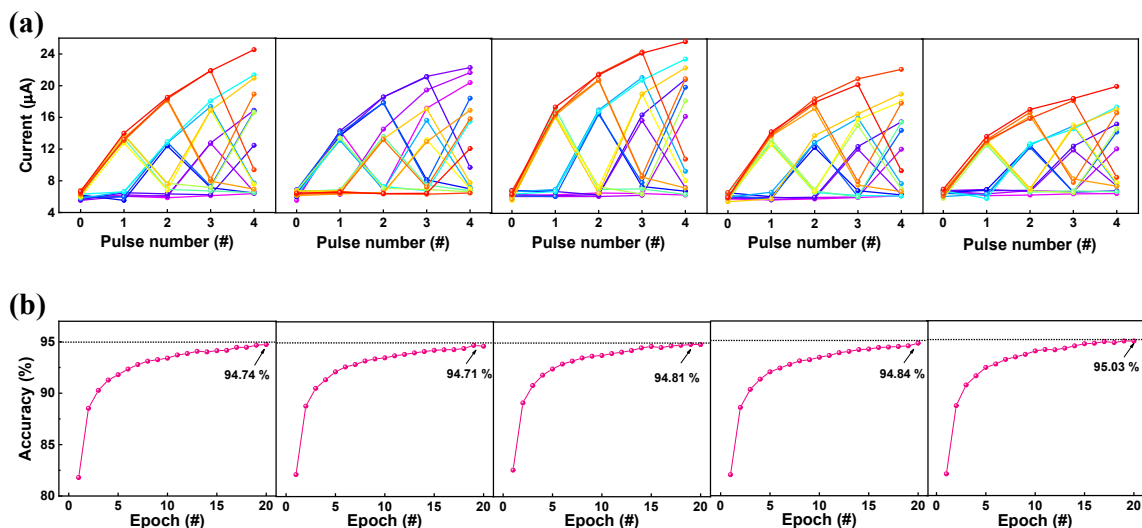

**Figure S8.** (a) 4-bit reservoir computing implemented from 5 different cells. (b) Pattern recognition accuracy achieved with 20 consecutive epochs applied to 5 cells.

#### References

- [S1] W. Song, W. Wang, H. K. Lee, M. Li, V. Y. Q. Zhuo, Z. Chen, K. J. Chui, J. C. Liu, I. T. Wang, Y. Zhu and N. Singh, *Appl. Phys. Lett.*, 2019, 115, 133501.
- [S2] J. H. Ryu and S. Kim, *Chaos Solitons Fractals*, 2020, 140, 110236.
- [S3] S. Ali, M. Hussain, M. Ismail, M. W. Iqbal and S. Kim, *J. Alloys Compd.*, 2024, 997, 174802.
- [S4] P. Jetty, U. M. Kannan and S. Jammalamadaka, *ACS Appl. Electron. Mater.*, 2024, 6, 1992–2002.
- [S5] K. C. Chuang, C. Y. Chu, H. X. Zhang, J. D. Luo, W. S. Li, Y. S. Li and H. C. Cheng, *IEEE J. Electron Devices Soc.*, 2019, 7, 589–595.
- [S6] J. Yang, H. Cho, H. Ryu, M. Ismail, C. Mahata and S. Kim, *ACS Appl. Mater. Interfaces*, 2021, 13, 33244–33252
